# Supplementary material
Source: MDPI journal article supplement (https://www.mdpi.com/2076-3417/9/5/935)
Supplement: s1 [file s1]

# Morphology-controlled Versatile One-pot Synthesis of Hydrophobic Gold Nanodots, Nanobars, Nanorods and Nanowires and their Applications in Surface Enhanced Raman Spectroscopy

Jing Neng, Chen Xiang, Kan Jia, Xiaohua Nie and Peilong Sun

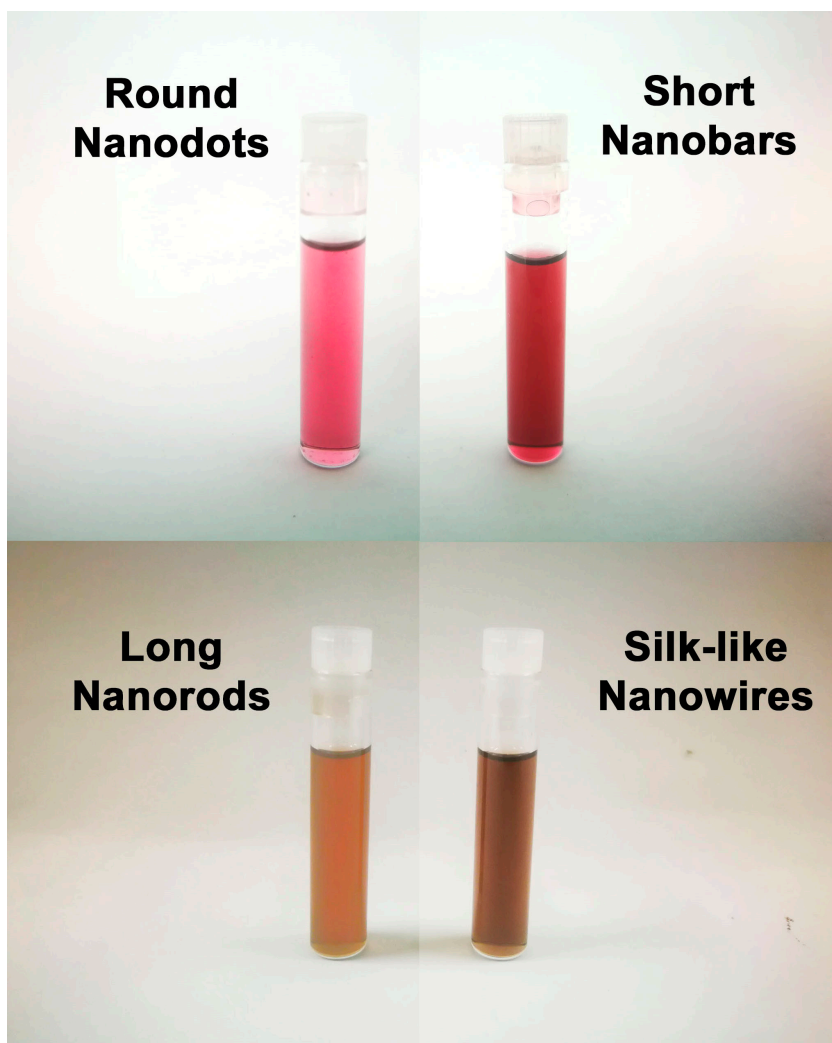

**Figure 1S.** Photo images of the solutions of gold round nanodots, short nanobars, long nanorods and silk-like ultralong and ultrathin nanowires in chloroform.

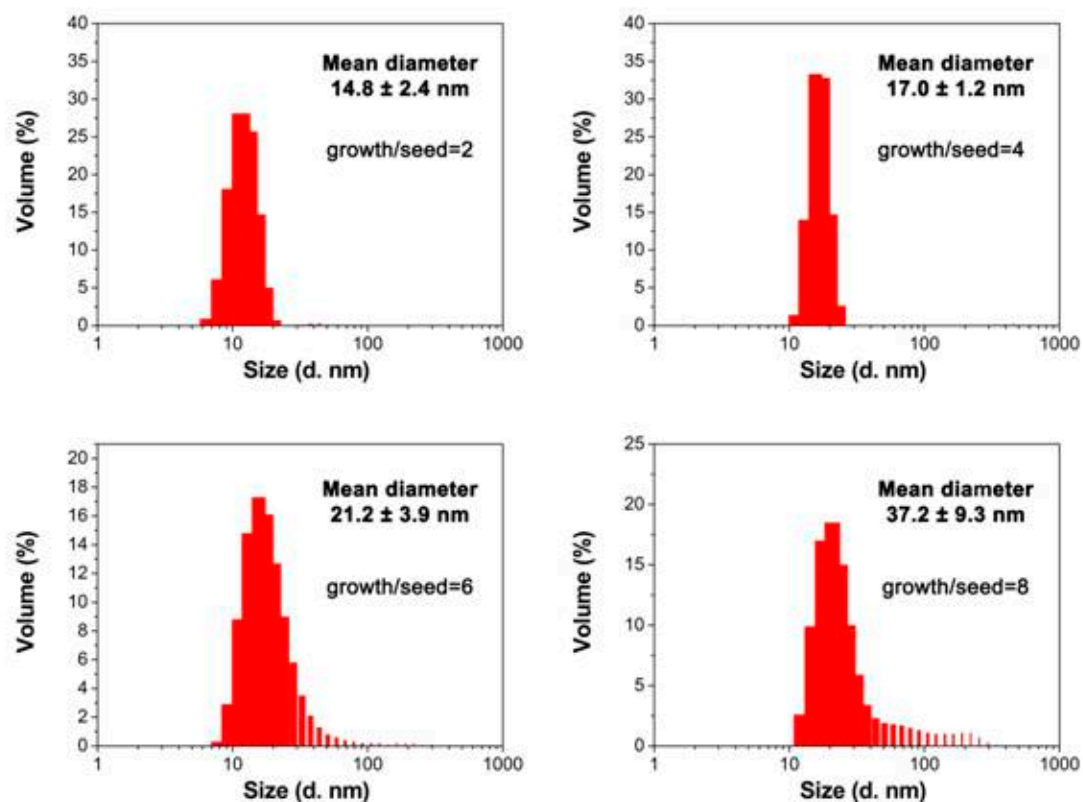

**Figure 2S.** The size of Au nanoparticles measured by dynamic light scattering (DLS) at the growth/seed ratio of 2, 4, 6 and 8, respectively.
